# Muller's Ratchet in Asexual Populations Doomed to Extinction

Logan Chipkin<sup>1</sup>, Peter Olofsson<sup>2,3</sup>, Ryan C. Daileida<sup>2</sup>, Ricardo B. R. Azevedo<sup>1\*</sup>

\*For correspondence:  
[razevedo@uh.edu](mailto:razevedo@uh.edu)

<sup>1</sup>Department of Biology & Biochemistry, University of Houston, Houston, Texas, U.S.A.;

<sup>2</sup>Department of Mathematics, Trinity University, San Antonio, Texas, U.S.A.;

<sup>3</sup>Department of Mathematics, Physics and Chemical Engineering, Jönköping University, Sweden

**Abstract** Asexual populations are expected to accumulate deleterious mutations through a process known as Muller's Ratchet. Lynch, Gabriel, and colleagues have proposed that the Ratchet eventually results in a vicious cycle of mutation accumulation and population decline that drives populations to extinction. They called this phenomenon mutational meltdown. Here, we analyze the meltdown using a multitype branching process model where, in the presence of mutation, populations are doomed to extinction. We find that extinction occurs more quickly in small populations, experiencing a high deleterious mutation rate, and mutations with more severe deleterious effects. The effects of mutational parameters on extinction time in doomed populations differ from those on the severity of Muller's Ratchet in populations of constant size. We also find that mutational meltdown, although it does occur in our model, does not determine extinction time. Rather, extinction time is determined by the expected impact of deleterious mutations on fitness.

## Introduction

"All populations are doomed to eventual extinction." *Lynch and Gabriel (1990)*

In the absence of back mutations, an asexual individual cannot produce offspring carrying fewer deleterious mutations than itself. Indeed, it is always possible that individual offspring will accrue additional deleterious mutations. As a result, the class of individuals with the fewest deleterious mutations may, by chance, disappear irreversibly from the population, a process known as Muller's Ratchet (*Muller, 1964; Felsenstein, 1974; Haigh, 1978*). Successive "clicks" of the Ratchet will cause the fitness of asexual populations to decline. Muller's Ratchet has been invoked to explain the evolution of sex (*Muller, 1964; Felsenstein, 1974; Gordo and Campos, 2008*), the extinction of small populations (*Lynch et al., 1993, 1995a*), the accelerated rate of evolution of endosymbiotic bacteria (*Moran, 1996*), the degeneration of Y-chromosomes (*Charlesworth, 1978; Gordo and Charlesworth, 2000b*), and cancer progression (*McFarland et al., 2013, 2014*).

*Haigh (1978)* argued that the Ratchet should click at a rate inversely proportional to the size of the least-loaded class in a population. If  $k$  is the lowest number of deleterious mutations present in an individual in the population, the size of the least-loaded class at mutation-selection-drift equilibrium is

$$\hat{n}_k = N e^{-U/s} \quad , \quad (1)$$

where  $N$  is the size of the population,  $U$  is the expected number of deleterious mutations per genome per generation, and  $s$  is the deleterious effect of a mutation. Haigh suggested that genetic drift causes the actual value of  $n_k$  to deviate stochastically from  $\hat{n}_k$ . The smaller the value of  $\hat{n}_k$ , the

41 greater the probability that  $n_k$  will hit zero, causing the Ratchet to click. If  $\hat{n}_k > 1$ , then after a click  
42 of the Ratchet, the size of the new least-loaded class will go to a new equilibrium,  $\hat{n}_{k+1}$ , equal to  
43  $\hat{n}_k$  in **Equation 1**. Haigh concluded that Muller's Ratchet should click faster in small populations,  
44 experiencing a high deleterious mutation rate, and mutations with milder deleterious effects (low  
45  $s$ ). Subsequent work has derived more accurate estimates of the rate of clicking of the Ratchet,  
46 both when  $\hat{n}_k > 1$  (**Stephan et al., 1993; Gordo and Charlesworth, 2000a,b; Neher and Shraiman,**  
47 **2012; Metzger and Eule, 2013**) and when  $\hat{n}_k < 1$  (**Gessler, 1995; Rouzine et al., 2003, 2008**).

48 Beginning with Haigh's foundational study, most research on Muller's Ratchet has assumed  
49 that the size of a population remains constant as deleterious mutations accumulate (e.g., **Gessler,**  
50 **1995; Gordo and Charlesworth, 2000a,b; Rouzine et al., 2003; Metzger and Eule, 2013**). This as-  
51 sumption is biologically unrealistic—if true, fitness would decline continuously but the population  
52 would be immortal (**Lynch and Gabriel, 1990; Melzer and Koeslag, 1991**). Lynch, Gabriel, and col-  
53 leagues studied more realistic models where the fitness of an individual influences its fertility and  
54 populations experience density-dependent regulation (**Lynch and Gabriel, 1990; Lynch et al., 1993;**  
55 **Gabriel et al., 1993; Lynch et al., 1995a**). They found that Muller's Ratchet causes population size  
56 to decline, which accelerates the Ratchet, which further reduces population size. This positive  
57 feedback results in a "mutational meltdown" that drives the population to extinction (**Lynch and**  
58 **Gabriel, 1990; Lynch et al., 1993; Gabriel et al., 1993**).

59 In one model, **Lynch et al. (1993)** considered a population of asexual organisms subject to a  
60 carrying capacity of  $\hat{N}$  individuals. Each individual produces  $R$  offspring. The number of mutations  
61 is Poisson distributed with rate  $U$ . The offspring then undergo viability selection with a probability  
62 of survival

$$w_k = (1 - s)^k \quad , \quad (2)$$

63 where  $k \geq 0$  is the number of deleterious mutations in the individual offspring, and  $0 < s < 1$  is  
64 the deleterious effect of each mutation. If the number of offspring surviving viability selection is  
65  $N' > \hat{N}$ ,  $N' - \hat{N}$  individuals die and  $\hat{N}$  individuals survive, independently of their fitness; if  $N' \leq \hat{N}$ ,  
66 all  $N'$  individuals survive. Reproduction occurs after viability selection and density-dependent  
67 regulation. Assuming that initially all individuals in the population are mutation-free and that  $NR >$   
68  $\hat{N}$ , Muller's Ratchet proceeds in three phases in this model. First, mutations enter the population  
69 and accumulate rapidly. As the distribution of mutation numbers approaches mutation-selection-  
70 drift equilibrium mutation accumulation slows down. Second, the rate of mutation accumulation  
71 settles into a steady rate. This phase proceeds as in the classic constant population size model of  
72 Muller's Ratchet (**Haigh, 1978**) and lasts while  $NR\bar{w} \gtrsim \hat{N}$ . Third, when mean viability reaches  $\bar{w} =$   
73  $1/R$  (i.e., when  $NR\bar{w} = \hat{N}$ ) the population size begins to decline, triggering mutational meltdown.  
74 During this phase the population is doomed to extinction.

75 **Lynch et al. (1993)** derived some analytical expressions to describe the dynamics of mutation  
76 accumulation during the first two phases and the times at which these two phases end. However,  
77 they did not present any analytical theory on the dynamics or duration of the third (meltdown)  
78 phase itself (see also **Gabriel et al., 1993; Lynch et al., 1995a**). Thus, the validity of the Lynch-  
79 Gabriel view of the mutational meltdown is difficult to evaluate. Here we model the mutational  
80 meltdown phase of Muller's Ratchet using a multitype branching process. We derive an analytical  
81 approximation for the expected time to extinction under this model of populations doomed to  
82 extinction. We find that extinction occurs more quickly in small populations, experiencing a high  
83 deleterious mutation rate ( $u$ ), and mutations with *more severe* deleterious effects (high  $s$ ). Our  
84 results differ from predictions on the relationship between the severity of Muller's Ratchet and  
85 mutational parameters in populations of constant size. We also find that mutational meltdown,  
86 although it does occur in doomed populations, is not an important determinant of time to extinc-  
87 tion. Rather, extinction time is approximately inversely proportional to the product  $us$ , that is, the  
88 expected impact of deleterious mutations on fitness.

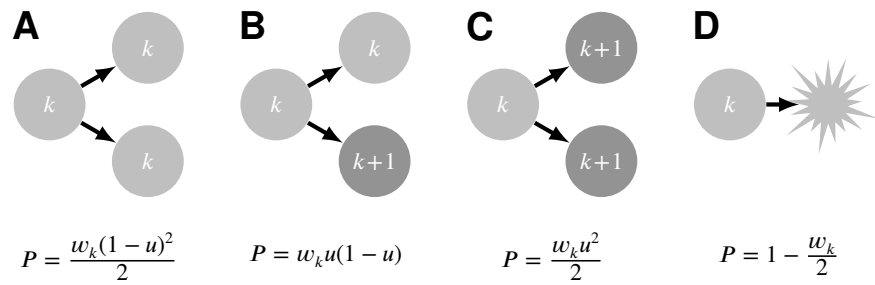

**Figure 1.** Multitype branching process. At each time step, an individual of type  $k$ —i.e. with  $k$  deleterious mutations (light gray)—can have one of four fates (**A–D**) with different probabilities,  $P$  (see **Table 1**). It can either die (**D**) or survive and split into two daughters (**A–C**). The daughters inherit the  $k$  mutations from their mother. A daughter can acquire one additional mutation and become a type  $k + 1$  individual (dark gray) (**B–C**).

## Model

### Branching process

A population consists of  $N_k$  individuals with  $k = 0, 1, 2, \dots$  deleterious mutations. Below, we refer to individuals with  $k$  deleterious mutations as belonging to type  $k$ .

The size  $N = \sum_i N_i$  of the population is allowed to change according to a discrete-time branching process. Each generation, an individual of type  $k$  reproduces by splitting into two daughters with probability  $w_k/2$  and dies with probability  $1 - w_k/2$  (**Figure 1**), where  $w_k$  is the expected number of offspring of an individual of type  $k$ —i.e., its *absolute fitness* (**Equation 2**). We assume that all mutations have the same deleterious effect  $s$  and do not interact epistatically.

Any offspring may acquire one deleterious mutation with probability  $u$ . Note that  $u$  is defined differently from the mutation rate,  $U$ , in Haigh’s model (**Equation 1**). The number of mutant offspring of a surviving individual of any type is binomially distributed with parameters 2 and  $u$  (**Figure 1**).

This branching process yields the probability generating function (p.g.f.) of the number of  $k$ -type offspring of a  $k$ -type individual

$$\varphi_k(x) = 1 - \frac{w_k}{2} (1 - u^2 - 2u(1-u)x - (1-u)^2 x^2) \quad (3)$$

and mean reproduction matrix  $M$  with entries

$$\begin{cases} m_{k,k} &= w_k(1-u) \\ m_{k,k+1} &= w_k u \end{cases} \quad (4)$$

where  $m_{i,j}$  is the expected number of offspring of type  $j$  generated by an individual of type  $i$ . All other entries of  $M$  are 0.

The mean reproduction matrix for generation  $t$  is  $M^t$ , the  $t$ -th power of  $M$ . For any  $t$ , all entries of  $M^t$  below the diagonal are 0. Assuming the fitness function in **Equation 2**, we can get an explicit form for the entries  $m_{i,j}^{(t)}$  of  $M^t$ :

$$m_{k,k+j}^{(t)} = (1-u)^{t-j} u^j (1-s)^{tk + \frac{j(j-1)}{2}} \prod_{i=1}^j \frac{1 - (1-s)^{t+1-i}}{1 - (1-s)^i} \quad (5)$$

where  $j = 0, 1, 2, \dots$ . For a proof, see **Appendix 1**.

### Extinction time of individuals of type $k$

Let  $\tau_k$  denote the time of extinction of individuals of type  $k$  in a population started from  $N_k$  ancestors of type  $k$  where  $N_k$  is a random variable on  $\{0, 1, 2, \dots\}$  (if  $N_k = 0$ , then  $\tau_k = 0$ ). There are no individuals of type  $i < k$  in the population. By a standard result from probability theory

$$E[\tau_k] = \sum_{t=0}^{\infty} P(\tau_k > t) \quad .$$

**Table 1.** Variables and parameters.

| Symbol       | Description                                                                                                                     |
|--------------|---------------------------------------------------------------------------------------------------------------------------------|
| $u$          | Probability that an individual acquires a deleterious mutation ( <b>Figure 1</b> ).                                             |
| $s$          | Deleterious effect of a mutation ( <b>Equation 2</b> ).                                                                         |
| $w_k$        | Fitness of an individual of type $k$ , i.e. with $k$ deleterious mutations ( <b>Equation 2</b> ).                               |
| $m_{i,j}$    | Expected number of offspring of type $j$ generated by an individual of type $i$ ( <b>Equation 4</b> ).                          |
| $n_0$        | Initial number of mutation-free individuals in the population.                                                                  |
| $n_k$        | Expected number of $k$ -type individuals in the population.                                                                     |
| $N$          | Total population size ( <b>Equation 19</b> ).                                                                                   |
| $t_k$        | Expected extinction time of $k$ -type individuals in generations, i.e. the $k$ -th click of the Ratchet ( <b>Equation 12</b> ). |
| $\Delta t_k$ | Interval between clicks $k - 1$ and $k$ of the Ratchet ( <b>Equation 21</b> ).                                                  |
| $x_k$        | Expected number of $k$ -type individuals at the extinction time of type $k - 1$ ( <b>Equation 11</b> ).                         |
| $\mathbf{T}$ | Expected extinction time of the entire population in generations ( <b>Equation 10</b> ).                                        |

115 The time of extinction of the entire type- $k$  subpopulation is the time of extinction of the  $N_k$   
 116 independent subpopulations started from the ancestors. The p.g.f. of the number of  $k$ -type indi-  
 117 viduals in generation  $t$  is given by the  $t$ -fold composition of  $\varphi_k$  (**Equation 3**) with itself, denoted by  
 118  $\varphi_k^{(t)}$ . We get

$$\tau_k = \max\{\tau_{k,1}, \dots, \tau_{k,N_k}\}$$

119 where  $\tau_{k,j}$  is the time of extinction of the subpopulation started from the  $j$ th individual,  $j = 1, \dots, N_k$ .  
 120 If we let  $Z_t^{(k,j)}$  denote the number of type- $k$  individuals in generation  $t$  stemming from the  $j$ th  
 121 individual we have the equivalence

$$\tau_{k,j} \leq t \Leftrightarrow Z_t^{(k,j)} = 0$$

122 and get the conditional probability given  $N_k$

$$\begin{aligned} P(\tau_k > t | N_k) &= 1 - P(\tau_k \leq t | N_k) \\ &= 1 - \prod_{j=1}^{N_k} P(\tau_{k,j} \leq t) \\ &= 1 - \left(\varphi_k^{(t)}(0)\right)^{N_k} \end{aligned}$$

123 for  $t > 0$  which gives

$$E[\tau_k] = P(\tau_k > 0) + E\left[\sum_{t=1}^{\infty} \left(1 - \left(\varphi_k^{(t)}(0)\right)^{N_k}\right)\right]$$

124 With  $n_k = E[N_k]$ , a first-order Taylor approximation gives

$$E[\tau_k] \approx P(\tau_k > 0) + \sum_{t=1}^{\infty} \left(1 - \left(\varphi_k^{(t)}(0)\right)^{n_k}\right) \quad (6)$$

125 Note that for  $k = 0$  we have  $P(\tau_0 > 0) = 1$  because there are always individuals present at time 0.  
 126 For  $k > 0$ , however, we have  $P(\tau_k > 0) < 1$  because, for example, the entire population may already  
 127 be extinct in generation 1.

128 In a similar way, we get the variance as

$$\text{Var}[\tau_k] = E[\tau_k(\tau_k - 1)] + E[\tau_k] - E^2[\tau_k] \quad (7)$$

129 where

$$E[\tau_k(\tau_k - 1)] = 2 \sum_{t=1}^{\infty} t P(\tau_k > t) \\ \approx 2 \sum_{t=1}^{\infty} t \left( 1 - \left( \varphi_k^{(t)}(0) \right)^{n_k} \right)$$

130 **Extinction time of the entire population**

131 By well-known results from the theory of branching processes, the extinction time of the entire  
132 population has finite mean only in the *subcritical* case, that is, when the mean number of offspring  
133 per individual is less than 1. The expected number of offspring of type  $k$  produced by an individual  
134 of type  $k$  is  $m_{k,k}$  (**Equation 4**). If  $m_{k,k} = 1$  (the *critical* case), the extinction time  $\tau_k$  is finite but has an  
135 infinite mean and if  $m_{k,k} > 1$  (the *supercritical* case),  $\tau_k$  itself may assume the value  $\infty$ .

136 **Equation 4** shows that  $m_{k,k} < 1$  (the *subcritical* case) for individuals of any type  $k$  provided all  
137 mutations are deleterious ( $0 < s < 1$ ) and the mutation rate is nonzero ( $u > 0$ ). Thus, the expected  
138 extinction time of every type  $k$  is finite. In other words, the population is doomed to eventual  
139 extinction.

140 Start with a fixed number  $n_0$  of mutation-free individuals and denote by  $T_0$  the time (generation)  
141 of extinction of this class. Conditioned on  $T_0$ , the expected number of individuals in class 1 (those  
142 with  $k = 1$  mutation) is therefore  $m_{0,1}^{(T_0)}$  (see **Equation 5**) which we note is a function of the random  
143 variable  $T_0$ . Thus, the expected number of individuals in class 1 at the time of extinction of class  
144 0 is obtained by taking the expected value in  $m_{0,1}^{(T_0)}$ . To this end, recall **Equation 5** and define the  
145 function

$$g_1(\cdot) = m_{0,1}^{(\cdot)}$$

146 so that

$$E \left[ m_{0,1}^{(T_0)} \right] = E[g_1(T_0)] \\ \approx g_1(E[T_0])$$

147 where we use a first-order Taylor approximation. To generalize the idea, we define the expected  
148 number of descendants of type  $j$  from a mutation-free individual after  $t$  generations

$$g_j(t) = \begin{cases} 0 & , \quad t < j \\ m_{0,j}^{(t)} & , \quad t \geq j \end{cases} \quad (8)$$

149 (see **Equation 5**).

150 Now let  $T_k$  be the extinction time for type  $k$  and let  $t_k = E[T_k]$ . Then we have the approximation

$$E \left[ m_{0,k+j}^{(T_k)} \right] \approx g_{k+j}(t_k) \quad (9)$$

152 the expected number of individuals of type  $k + j$  at the extinction of type  $k$  for  $j = 1, 2, \dots$  The  
153 expected extinction time of the entire population is

$$\mathbf{T} = E[T] = \lim_{k \rightarrow \infty} t_k \quad . \quad (10)$$

154 Now let  $X_{T_{k-1}}^{(k)}$  be the number of  $k$ -type individuals at the extinction time of type  $k - 1$  and let

$$x_k = E \left[ X_{T_{k-1}}^{(k)} \right] \approx n_0 g_k(t_{k-1}) \quad . \quad (11)$$

155 From **Equation 6**, the expected extinction times of consecutive classes can be computed as

$$t_k \approx t_{k-1} + P(\tau_k > 0) + \sum_{i=1}^{\infty} \left(1 - \left(\varphi_k^{(i)}(0)\right)^{x_k}\right) \quad (12)$$

156 where  $n_0$  is the initial population size. Note that  $t_k$  is the time of the  $k$ -th click of the Ratchet. As we  
 157 noted above, for  $k = 0$  we have  $P(\tau_0 > 0) = 1$  (**Equation 6**). Thus, if the population is founded by  $n_0$   
 158 mutation-free individuals, the time to extinction of the mutation-free class is given exactly by

$$t_0 = 1 + \sum_{i=1}^{\infty} \left(1 - \left(\varphi_k^{(i)}(0)\right)^{n_0}\right) \quad (13)$$

159 When  $k > 0$ , **Equation 12** is an approximation (see **Equation 6** and **Equation 11**). In addition, we  
 160 do not have a closed form expression for  $P(\tau_k > 0)$  for  $k > 0$ . We can, however, place bounds on  
 161  $P(\tau_k > 0)$  by noting that

$$\tau_k > 0 \Leftrightarrow X_{T_{k-1}}^{(k)} > 0 \quad (14)$$

162 and that if  $Y$  is any random variable on  $\{0, 1, 2, \dots\}$  we have

$$\begin{aligned} E[Y] &= E[Y|Y > 0] P(Y > 0) \\ &\geq P(Y > 0) \end{aligned} \quad (15)$$

163 By **Equation 11**, **Equation 14**, and **Equation 15** we get the bounds

$$0 \leq P(\tau_k > 0) \leq \min(1, x_k) \quad (16)$$

164 Because extinction of the whole population is irreversible,  $P(\tau_k > 0)$  is expected to decline for  
 165 successive classes:

$$P(\tau_k > 0) \leq P(\tau_{k-1} > 0) \quad .$$

### 166 Large initial population size

167 The expected time to extinction of the mutation-free class,  $t_0$ , is given by **Equation 13**. Following  
 168 **Jagers et al. (2007)**, there exists a sequence  $c(n_0) \rightarrow c$  as  $n_0 \rightarrow \infty$  such that

$$t_0 = -\frac{\ln n_0 + c(n_0)}{\ln m_{0,0}} \quad , \quad (17)$$

169 where  $m_{0,0} = 1 - u < 1$  (**Equation 4**) is the expected number of mutation-free offspring per mutation-  
 170 free individual and  $n_0$  is the initial number of mutation-free individuals. Note that the value of  $c$   
 171 depends on  $u$  (e.g., for  $u = 0.01$  and  $0.02$ , numerical estimates using **Equation 13** and **Equation 17**  
 172 yield  $c = 3.3737$  and  $2.7058$ , respectively).

173 **Equation 17** shows that  $t_0$  grows logarithmically with  $n_0$  with a slope of  $-1/\ln m_{0,0}$ . If  $u$  is small,  
 174 the slope becomes  $\approx 1/u$ . Thus, increasing initial population size delays extinction of the mutation-  
 175 free class more when the mutation rate is low than when it is high.

176 The value of  $t_0$  is not affected by the effects of mutations,  $s$  (**Equation 13** and **Equation 17**),  
 177 because the rate at which individuals “leave” the mutation-free class is independent of  $s$ . The  
 178 selection coefficient does, however, affect the size of the new least-loaded class (i.e., individuals  
 179 with  $k = 1$  mutation),  $x_1$  (**Equation 11**), and therefore the total time to extinction.

180 We now investigate the limiting behavior of  $x_1$  as  $n_0 \rightarrow \infty$ . By **Equation 11** and **Equation 17** we  
 181 get

$$\begin{aligned} x_1 &\approx n_0 g_1(t_0) \\ &= \frac{C(n_0)u}{s(1-u)} \left(1 - (1-s)^{t_0}\right) \\ &\rightarrow \frac{Cu}{s(1-u)} \end{aligned} \quad (18)$$

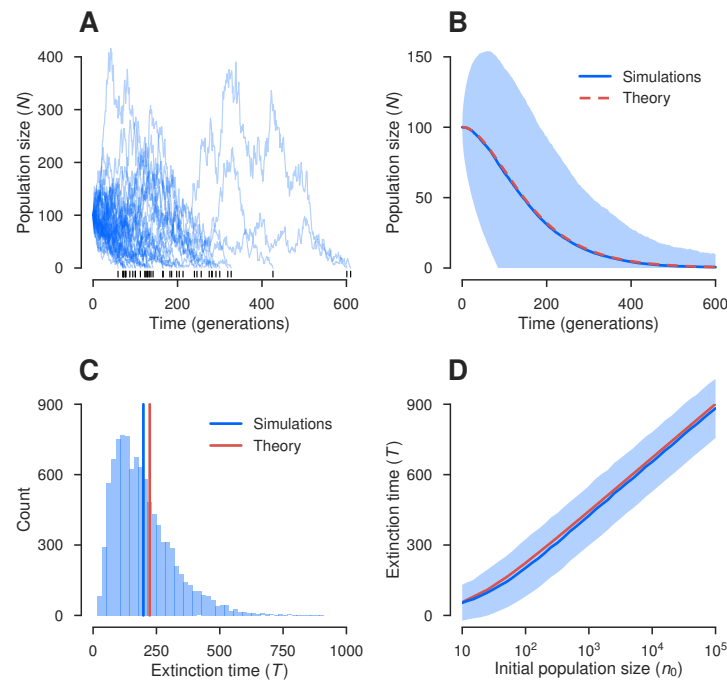

**Figure 2.** Populations are doomed to extinction in our model. **(A)** Dynamics of population size,  $N$ , in 40 populations founded by  $n_0 = 100$  mutation-free individuals and subject to mutations with deleterious effect  $s = 0.01$  and rate  $u = 0.01$ . Black vertical lines above the time axis indicate extinction times. **(B)** Blue line shows mean  $N$  based on stochastic simulations of  $10^4$  replicate populations like those shown in **(A)**. Light blue region indicates  $\bar{N} \pm \text{SD}[N]$  (standard deviation). If  $\text{SD}[N] > \bar{N}$ , the lower bound of the region was set to zero. Red dashed line indicates expected population size (*Equation 19*). **(C)** Distribution of extinction times,  $T$ , in the stochastic simulations described in **(B)**. Blue line shows mean  $T$  based on the  $10^4$  replicate populations. Red line shows  $T$  calculated numerically (see **Materials and Methods**). **(D)** Extinction times of populations with the same mutational parameters as those in **(A)** but with a range of initial populations sizes,  $n_0$ . Blue line shows mean values of  $T$  based on stochastic simulations of  $10^4$  replicate populations for 41 values of  $n_0$  evenly spaced on a log-scale over 4 orders of magnitude. Light blue region indicates  $\bar{T} \pm \text{SD}[T]$ . If  $\text{SD}[T] > \bar{T}$ , the lower bound of the region was set to zero. See *Figure 2-Figure Supplement 1* for more on the variability of  $T$ . Red line shows  $T$  calculated numerically.

**Figure 2-Figure supplement 1.** Variability of extinction time declines with population size.

**Figure 2-source data 1.** The code to generate these figures is in the Jupyter notebook <https://github.com/rbazev/doomed/blob/master/python/fig2.ipynb>.

**Figure 2-source data 2.** The data to generate these figures is at <https://github.com/rbazev/doomed/blob/master/python/data/> (files named `fig2*`).

182 as  $n_0 \rightarrow \infty$ , where  $C(n_0) = e^{c(n_0)}$ . If  $u$  is small and  $n_0$  is large, *Equation 18* becomes  $x_1 \approx Cu/s$ .  
 183 Interestingly, *Equation 18* shows that  $x_1$  approaches a constant as  $n_0$  increases.

### 184 Change in population size

185 If a population is founded by  $n_0$  mutation-free individuals, the expected total population size  $t$   
 186 generations later is

$$E[N(t)] = n_0 \sum_{j=0}^t g_j(t) \quad (19)$$

187 (see *Equation 8*).

188 Initially,  $N(0) = n_0$ . Since all individuals have the same fitness, the population size is not ex-  
 189 pected to change in the following generation:  $E[N(1)] = n_0$ . One generation later, the population  
 190 size is expected to decline by  $E[N(2)] - E[N(1)] = -n_0us$ . In subsequent generations, if mutations  
 191 have small effects, the population size is expected to continue to decline at approximately the



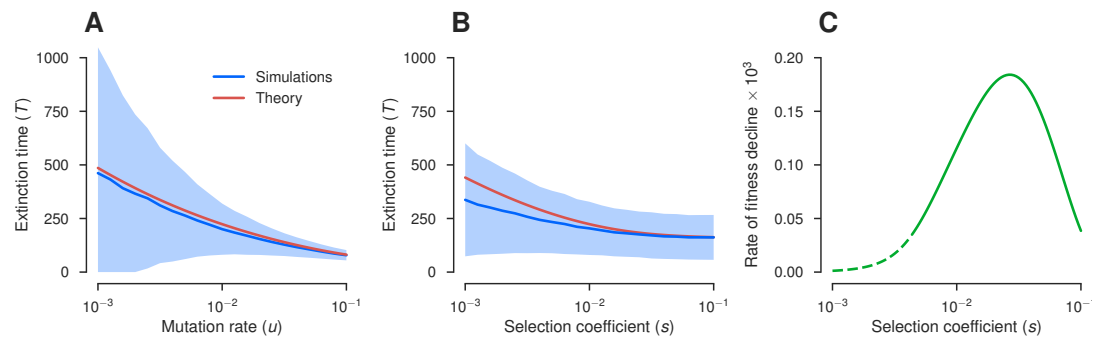

**Figure 3.** Mutational parameters have different effects on extinction time in doomed populations and the severity of Muller’s Ratchet in populations of constant size. **(A–B)** Values are mean extinction times,  $T$ , in populations founded by  $n_0 = 100$  mutation-free individuals but with different mutational parameters. **Figure 3–Figure Supplement 1** shows the variability of  $T$ . **(A)** Mutations have deleterious effect  $s = 0.01$  and a range of mutation rates,  $u$ . **(B)** Mutations occur with  $u = 0.01$  and have a range of values of  $s$ . Blue lines show mean values of  $T$  based on stochastic simulations of  $10^4$  replicate populations for 21 values of the parameter being manipulated, evenly spaced on a log-scale. Light blue regions indicate  $\bar{T} \pm \text{SD}[T]$ . If  $\text{SD}[T] > \bar{T}$ , the lower bound of the region was set to zero. Red lines show  $T$  calculated numerically (see **Materials and Methods**) for 41 values of the parameter being manipulated, evenly spaced on a log-scale. **Figure 3–Figure Supplement 2** shows that the theoretical predictions for low  $s$  become more accurate with increasing population size. **(C)** Severity of Muller’s Ratchet in populations of constant size and a deleterious mutation rate of  $U = 0.01$  per genome per generation. Values are the expected declines in mean fitness per thousand generations,  $10^3 \times s/\Delta t$ , for 101 values of  $s$  evenly spaced on a log-scale.  $\Delta t$  is the time between clicks of the Ratchet calculated using the method of **Gordo and Charlesworth (2000a,b)**. Dashed and solid lines indicate  $\hat{n}_k < 10$  and  $\hat{n}_k \geq 10$ , respectively (**Equation 1**). The trend shown in **(C)** was confirmed by simulation (not shown).

**Figure 3–Figure supplement 1.** Variability of extinction time declines with mutation rate and is approximately invariant with selection coefficient.

**Figure 3–Figure supplement 2.** Theoretical predictions for low  $s$  become more accurate with increasing population size.

**Figure 3–source data 1.** The code to generate these figures is in the Jupyter notebook <https://github.com/rbazev/doomed/blob/master/python/fig3.ipynb>.

**Figure 3–source data 2.** The data to generate these figures is at <https://github.com/rbazev/doomed/blob/master/python/data/> (files named fig3\*).

192 same rate

$$E[N(t+1)] - E[N(t)] \approx -n_0 u s t \quad (20)$$

## 193 Results

### 194 Small population size, high mutation rate, and mutations of large effect accelerate 195 extinction

196 In our model, population size,  $N$ , can increase as well as decrease from generation to genera-  
197 tion. However, all increases are transient and the population will eventually go extinct (**Figure 2A**).  
198 The expected value of  $N$  can be predicted accurately by **Equation 19** (**Figure 2B**). However, the  
199 dynamics of the expected value of  $N$  are not sufficient to predict the time to extinction. Two pop-  
200 ulations with different initial population sizes,  $n_0$ , will be expected to show the same  $N/n_0$  at any  
201 time (because they will have the same  $g_j(t)$ , **Equation 19**), but the smaller population is expected  
202 to go extinct earlier (**Figure 2C** and **Figure 2D**). **Equation 10** provides good estimates of expected  
203 extinction time,  $T$ , and variability in extinction time, over a broad range of initial population sizes,  
204  $n_0$  (**Figure 2D**, **Figure 2–Figure Supplement 1**, and **Figure 3–Figure Supplement 2**), and mutational  
205 parameters (**Figure 3A**, **Figure 3B**, and **Figure 3–Figure Supplement 1**). (See **Appendix 2** for an ex-  
206 planation of why **Equation 10** tends to overestimate the true value of  $T$ .) Below, we focus on the  
207 numerical calculations of  $T$  based on **Equation 10**.



208 Our model has three parameters— $n_0$ ,  $u$ , and  $s$ —and all of them influence extinction time.  
209 Smaller populations tend to go extinct faster. **Figure 2D** and **Figure 3–Figure Supplement 2A** show  
210 that  $T$  is approximately proportional to the logarithm of the initial population size,  $n_0$ . When  $n_0$   
211 is large,  $t_0 \propto \ln n_0$  (**Equation 17**) and  $x_1$  is approximately constant (**Equation 18**). Thus,  $\Delta t_1, \Delta t_2, \dots$   
212 (**Equation 21**) are also expected to approach constant values as  $n_0 \rightarrow \infty$ . Since  $t_0$  grows logarithmically,  
213 this result implies that  $t_0$  represents an increasing fraction of  $T$  as  $n_0$  increases. Therefore,  
214 we also expect  $T$  to grow logarithmically with  $n_0$ . Variability in extinction time declines with  $n_0$   
215 (**Figure 2–Figure Supplement 1**).

216 At a particular value of  $n_0$ , however,  $t_0$  is not sufficient to explain the variation in total extinction  
217 time for different mutational parameters:  $t_0$  dominates  $T$  when  $u/s$  is low, but not when it is high  
218 (**Figure 4B** and **Figure 4–Figure Supplement 1A**). One reason for this pattern is that  $x_1$  increases  
219 with  $u/s$  (**Equation 18**; **Figure 4C**).

220 Mutations cause extinction in our model, but how do they influence extinction time? One possi-  
221 bility is that  $T$  is determined by the severity of Muller’s Ratchet. High mutation rate and muta-  
222 tions of large effect accelerate extinction in doomed populations (**Figure 3A**, **Figure 3B**, and **Fig-  
223 ure 4A**). Mutational parameters act differently on Muller’s Ratchet in populations of constant size:  
224 at certain mutation rates the severity of the Ratchet is maximal at intermediate mutational effects  
225 (**Gabriel et al., 1993**; **Gordo and Charlesworth, 2000a,b**) (**Figure 3C**). There are two possible expla-  
226 nations for this discrepancy. First, the Ratchet may operate differently in doomed populations  
227 and populations of constant size. Second, Muller’s Ratchet may not determine extinction time in  
228 doomed populations. We explore each of these possibilities in the next two sections.

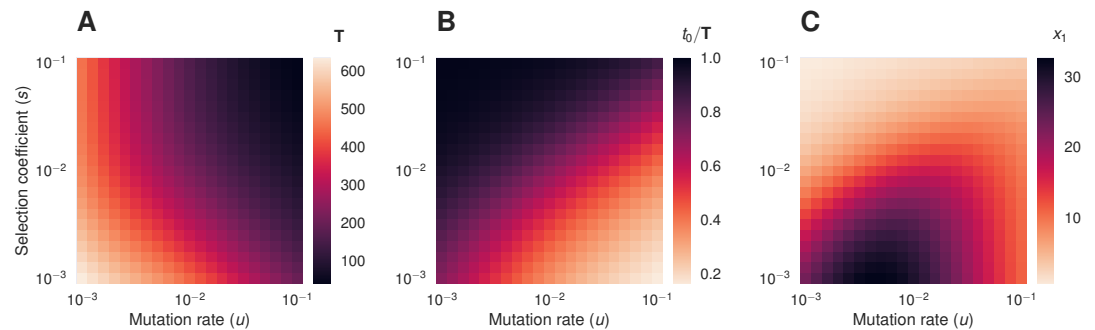

**Figure 4.** High mutation rate and mutations of large effect accelerate extinction in doomed populations. **(A)** Expected extinction time,  $T$ , of populations founded by  $n_0 = 100$  mutation-free individuals and subject to mutations with deleterious effect  $s$  and rate  $u$ .  $T$  was calculated numerically (see **Materials and Methods**) for  $21 \times 21 = 441$  combinations of values of  $s$  and  $u$  evenly spaced on a log-scale. (See **Figure 4–Figure Supplement 1B** for the variability of  $T$ .) **(B)** Expected extinction time of the mutation-free class,  $t_0$ , as a proportion of  $T$  for the populations shown in **(A)**.  $t_0$  was calculated numerically (see **Materials and Methods**). **Figure 4–Figure Supplement 1A** shows  $t_0$ . **(C)** Expected number of individuals with  $k = 1$  mutation at  $t_0$ ,  $x_1$  (**Equation 11**), for the populations shown in **(A)**.

**Figure 4–Figure supplement 1.** Expected extinction time of the mutation-free class and variability of extinction time.

**Figure 4–source data 1.** The code to generate these figures is in the Jupyter notebook <https://github.com/rbazev/doomed/blob/master/python/fig4.ipynb>.

229 **Low mutation rate and mutations of large effect accelerate mutational meltdown**  
230 Lynch and colleagues have proposed that Muller’s Ratchet accelerates in a doomed population as  
231 population size declines, driving the population to extinction—a phenomenon they called muta-  
232 tional meltdown (**Lynch and Gabriel, 1990**; **Lynch et al., 1993**; **Gabriel et al., 1993**). Do our doomed  
233 populations experience mutational meltdown?

234 To answer this question we need a way to quantify the rate of mutational meltdown. Let

$$\Delta t_k = \begin{cases} t_0 & , \quad k = 0 \\ t_k - t_{k-1} & , \quad k > 0 \end{cases} \quad (21)$$

235 be the interval between clicks  $k - 1$  and  $k$  of the Ratchet, where  $t_k$  denotes the time of the  $k$ -th  
 236 click. In populations of constant size, the Ratchet is expected to click at a steady rate over time,  
 237 that is,  $\Delta t_k$  is not expected to change with  $k$  (Haigh, 1978; Gordo and Charlesworth, 2000a,b). In  
 238 contrast, under mutational meltdown the Ratchet is expected to accelerate in successive clicks,  
 239 that is,  $\Delta t_k$  is expected to decline with  $k$ . We find that  $\Delta t_k$  declines approximately exponentially  
 240 with  $k$  in doomed populations (Figure 5A). Thus, we use the rate of this decline,  $\beta$ , to measure the  
 241 rate of mutational meltdown.

242 Mutational parameters have large effects on the rate of mutational meltdown. Low mutation  
 243 rate and mutations of large effect accelerate mutational meltdown (Figure 5). This result is consis-  
 244 tent with the effects of mutational parameters on  $\Delta t_0$  and  $\Delta t_1$  in large populations (Equation 17 and  
 245 Equation 18). Low values of  $u$  increase  $\Delta t_0$  and decrease  $x_1$ , and therefore  $\Delta t_1$ , causing mutational  
 246 meltdown to accelerate. High values of  $s$  have no effect on  $\Delta t_0$  but decrease  $x_1$ , and therefore  $\Delta t_1$ ,  
 247 also causing the meltdown to accelerate.

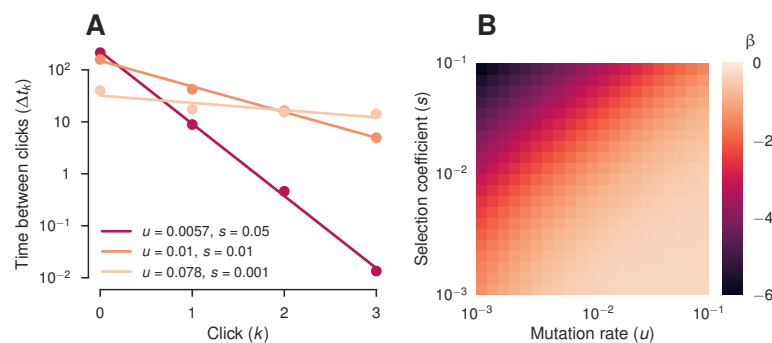

**Figure 5.** Mutational meltdown does not determine extinction time in doomed populations. **(A)** Circles denote time between clicks,  $\Delta t_k$  (Equation 21). Click  $k$  indicates the extinction of  $k$ -type individuals. Values of  $t_0$  were calculated using Equation 13; values of  $t_1, t_2$ , and  $t_3$  were calculated using Equation 12 (see Materials and Methods). Note that  $\Delta t_k$  is displayed on a log-scale. Each combination of mutational parameters results in populations having the same expected extinction time ( $T = 223.52$ ). Lines indicate linear regression fits of  $\ln \Delta t_k$  on  $k$  (meltdown rates:  $\beta = -3.20, -1.14$  and  $-0.32$ , respectively). **(B)** Meltdown rates,  $\beta$ , calculated as shown in (A) for  $21 \times 21 = 441$  combinations of values of  $s$  and  $u$  evenly spaced on a log-scale.

**Figure 5-source data 1.** The code to generate this figure is in the Jupyter notebook <https://github.com/rbazev/doomed/blob/master/python/fig5.ipynb>.

### 248 Extinction time is determined by the rate of fitness decline

249 Does mutational meltdown determine extinction time? Figure 5 shows that doomed populations  
 250 can experience strong mutational meltdown. However, mutational meltdown does not determine  
 251 extinction time. Although the three scenarios summarized in Figure 5A have widely different melt-  
 252 down rates, they have the same expected extinction time,  $T = 223.52$ . The lack of correlation  
 253 between  $T$  and  $\beta$  is clear when we compare Figure 4A and Figure 5B. Although the meltdown rate  
 254 does not determine extinction time, for a given extinction time, the meltdown rate is positively cor-  
 255 related with the variability in extinction time (Figure 3-Figure Supplement 1 and Figure 4-Figure  
 256 Supplement 1B).

257 The results so far indicate that Muller's Ratchet does not determine extinction time in doomed  
 258 populations. So what does? Extinction is, trivially, caused by decline in population size. In our  
 259 model the rate of decline in population size is determined by the product of mutation rate and  
 260 effect,  $us$  (Equation 20). This makes intuitive sense because the rate of decline in population size is

261 determined by the absolute fitness of individuals and both  $u$  and  $s$  are inversely related to fitness:  
262 increasing  $s$  reduces the fitness of an individual directly (*Equation 2*) and increasing  $u$  reduces the  
263 fitness of an individual's offspring. This explains why time to extinction declines with both  $u$  and  $s$   
264 (*Figure 4A*).

## 265 Discussion

266 Most models of Muller's Ratchet have assumed that populations maintain a constant size as  
267 deleterious mutations accumulate (*Haigh, 1978; Gessler, 1995; Gordo and Charlesworth, 2000a,b;*  
268 *Rouzine et al., 2003; Metzger and Eule, 2013*). This is typically justified as resulting from density-  
269 dependent regulation of population size. However, the assumption is unrealistic because it pre-  
270 vents populations from ever going extinct (*Lynch and Gabriel, 1990; Melzer and Koeslag, 1991*). In  
271 a series of studies relaxing the assumption of constant population size, Lynch, Gabriel, and col-  
272 leagues argued that Muller's Ratchet eventually generates a positive feedback where the Ratchet  
273 clicks, which causes population size to decline, which strengthens genetic drift relative to natu-  
274 ral selection, which in turn accelerates the Ratchet (*Lynch and Gabriel, 1990; Lynch et al., 1993;*  
275 *Gabriel et al., 1993*). They called this vicious cycle mutational meltdown and concluded that it  
276 drives populations to extinction. However, the lack of quantitative theory on the mutational melt-  
277 down has made it difficult to evaluate the Lynch-Gabriel hypothesis.

278 Our results challenge the Lynch-Gabriel hypothesis. Although doomed populations can ex-  
279 perience mutational meltdown—measured by the acceleration of Muller's Ratchet—the rate of  
280 mutational meltdown does not determine extinction time (*Figure 5A*). Therefore, the Lynch-Gabriel  
281 mutational meltdown is not a general *cause* of extinction. Rather, our results suggest that extinc-  
282 tion time is determined by the expected impact of deleterious mutations on fitness. Interestingly,  
283 if we compare populations with the same expected extinction time but different mutational pa-  
284 rameters, populations undergoing faster meltdown rate have more variable extinction times than  
285 populations undergoing slower meltdown (*Figure 4–Figure Supplement 1*).

286 The Lynch-Gabriel hypothesis emphasized the role of the change in the strength of genetic drift  
287 in causing mutational meltdown (e.g., “we refer to this synergism between mutation accumulation  
288 and random genetic drift as a mutational meltdown”; *Lynch et al., 1993*). Our results indicate that  
289 extinction in doomed populations is driven by mutation pressure, not genetic drift. *Gessler (1995)*  
290 identified a related phenomenon in the operation of Muller's Ratchet under constant population  
291 size: if the mutation rate is too high the Ratchet is driven by mutation pressure, not genetic drift.  
292 Since the expression “mutational meltdown” is now in common usage (e.g., *Poon and Otto, 2000;*  
293 *Rowe and Beebee, 2003; Allen et al., 2009; McFarland et al., 2014*), we propose that it be revised  
294 to refer to extinction caused by mutation pressure.

295 The extent to which real populations undergo mutational meltdown is unclear. A population  
296 must first enter the doomed regime. Models of Muller's Ratchet in populations of constant size  
297 have identified three major risk factors that can drive populations into the doomed regime: long-  
298 term reductions in population size, increases in mutation rate, and intermediate deleterious ef-  
299 fects of mutations (*Lynch and Gabriel, 1990; Lynch et al., 1993; Gabriel et al., 1993; Lynch et al.,*  
300 *1995a; McFarland et al., 2013*). Increased mutation rate can even drive a very large population  
301 into the doomed regime—a phenomenon known as lethal mutagenesis (*Bull et al., 2007*). Next,  
302 we consider the first two risk factors..

303 Population size can decline as a result of changes in the environment, such as, climate change,  
304 decreased food availability, emergence of infectious diseases, and habitat loss or fragmentation.  
305 For example, the emergence of Devil Facial Tumor Disease, a transmissible cancer, has caused the  
306 size of the Tasmanian devil population to decline by ~77% within 5 years (*Hawkins et al., 2006;*  
307 *Lazenby et al., 2018*). As a result, the devils are under risk of extinction (*McCallum et al., 2009*).  
308 Our results indicate that increasing population size causes relatively small delays in extinction in  
309 doomed populations.  $T$  is approximately proportional to the logarithm of initial population size

310 (Figure 2D). Similar results have been obtained in other stochastic models of population dynamics  
311 (Lande, 1993; Jagers et al., 2007).

312 Increases in mutation rate have been observed directly in experimental populations. For ex-  
313 ample, a population of *Escherichia coli* adapting to a constant environment evolved a mutator mu-  
314 tation after ~25,000 generations that increased mutation rate by ~150-fold (Barrick et al., 2009;  
315 Wielgoss et al., 2013). Evolution experiments have revealed that real populations can, indeed, ex-  
316 perience increased extinction risk when the mutation rate is high. Zeyl et al. (2001) allowed 12  
317 populations of the yeast *Saccharomyces cerevisiae* with genetically elevated mutation rate to evolve  
318 and found that two of them went extinct within 2,900 generations. One of these populations  
319 went extinct shortly after a large decline in fitness. Bank et al. (2016) subjected two populations of  
320 influenza A virus to gradually increasing concentrations of favipiravir, a drug that increases the mu-  
321 tation rate of the virus, and observed that both populations accumulated mutations rapidly and  
322 went extinct. The results from both of these studies are broadly consistent with the occurrence of  
323 a mutational meltdown. However, they do not allow us to distinguish between the Lynch-Gabriel  
324 model and ours.

325 The results described in the previous paragraph indicate that mutational meltdown might have  
326 clinical applications. Mutagenic agents are being explored as antiviral drugs (Loeb et al., 1999;  
327 Crotty et al., 2001; Pariente et al., 2001; Bank et al., 2016). Increased mutation rate in tumor cells  
328 has been found to correlate with improved outcomes for some cancers (Silva et al., 2000; Birkbak  
329 et al., 2011; Andor et al., 2016). Several inhibitors of key components of the DNA-repair and DNA  
330 damage-response machinery (e.g., PARP inhibitors, Lord et al., 2015), are currently being used to  
331 treat cancer, or are under preclinical or clinical development (Brown et al., 2017).

332 The relative theoretical neglect of the evolutionary dynamics in doomed populations is surpris-  
333 ing given that it is central to understanding the long-term consequences of both Muller's Ratchet  
334 (Lynch and Gabriel, 1990; Lynch et al., 1993; Gabriel et al., 1993; Lynch et al., 1995a) and lethal  
335 mutagenesis (Bull et al., 2007; Matuszewski et al., 2017). In both cases, the duration of the melt-  
336 down phase was dismissed because it was predicted to be short relative to the time required for  
337 the population to become doomed (Lynch et al., 1993, 1995a; Bull et al., 2007). We believe that  
338 this neglect of the meltdown phase is misplaced because it is an important phase in the life of a  
339 population—the last chance for the population to be rescued by beneficial mutations and avoid  
340 extinction. The dynamics and duration of the meltdown phase are expected to be important de-  
341 terminants of the probability of evolutionary rescue. For a given probability of beneficial mutation  
342 and selection coefficient of those mutations, populations that decline in size more slowly and re-  
343 tain higher proportions of mutation-free individuals for longer, are more likely to be rescued (Mar-  
344 tin et al., 2013). Rescue of doomed populations may play an important role in cancer progression  
345 (McFarland et al., 2013, 2014).

346 A central assumption of our model is that individuals experience hard selection (Wallace, 1975).  
347 The expected number of offspring of an individual is its absolute fitness,  $w_k$  (Equation 2), and is  
348 both density independent and frequency independent. The Lynch-Gabriel models make similar  
349 assumptions during the mutational meltdown phase (Lynch et al., 1993, 1995a). In contrast, classic  
350 models of Muller's Ratchet typically assume soft selection (Wallace, 1975). Constant population  
351 size implies density dependence. Selection is also frequency dependent: the expected number of  
352 offspring of an individual depends not only on its fitness, but on the fitness of other individuals  
353 in the population. The difference in the mode of selection in these models explains the different  
354 effects of the deleterious effect of a mutation,  $s$ , on extinction time in our model, and on the  
355 severity of Muller's Ratchet in classic models. In doomed populations, increasing  $s$  accelerates  
356 extinction, albeit with diminishing returns (Figure 2B and Figure 4). In models with soft selection,  
357 the Ratchet is most severe at an intermediate value of  $s$  (Figure 2C; Lynch et al., 1995a; Gordo and  
358 Charlesworth, 2000a,b).

359 In reality, populations do not necessarily experience either of the extremes of soft or hard se-  
360 lection. Factors such as population structure, resource availability, and the mechanism of competi-

361 tion can modulate the “softness” of selection in complex ways; different genotypes in a population,  
362 and even different genes, can experience different softness of selection (*Laffajian et al., 2010; Ho*  
363 *and Agrawal, 2012*). This raises the interesting question of how mutational meltdown operates in  
364 regimes of intermediate softness, or with a smooth transition between soft and hard selection as  
365 mutations accumulate.

366 Our model includes at least three other simplifications that could have important consequences  
367 for the evolutionary dynamics of doomed populations. First, the environment, and therefore selection,  
368 is constant. *Wardlaw and Agrawal (2012)* showed that temporal variation in selection can  
369 accelerate Muller’s Ratchet in populations of constant size. Second, all mutations are deleterious.  
370 Beneficial mutations could, potentially, rescue a population from extinction (*Martin et al., 2013*).  
371 Furthermore, compensatory mutations might become more common as fitness declines (*Poon*  
372 *and Otto, 2000; Silander et al., 2007*). Third, individuals reproduce asexually. Sex has been shown  
373 to slow down Muller’s Ratchet dramatically in populations of constant size (*Pamilo et al., 1987;*  
374 *Charlesworth et al., 1993*), and can delay extinction in large populations (*Lynch et al., 1995b*). We  
375 believe that our model provides a promising framework to explore the consequences of relaxing  
376 these assumptions for the fate of populations doomed to extinction.

## 377 **Materials and Methods**

### 378 **Numerical calculations**

379 Expected extinction time of the mutation-free class

380 We calculated  $t_0$  by computing *Equation 13* until the following criterion was met

$$\left(\varphi_k^{(t)}(0)\right)^{n_0} - \left(\varphi_k^{(t+1)}(0)\right)^{n_0} < 10^{-6} .$$

381 A similar criterion was applied when evaluating *Equation 7* and *Equation 12*.

382 Expected extinction time

383 We calculated  $\mathbf{T} = E[T]$  (*Equation 10*) by computing *Equation 12* until the following criterion was  
384 met

$$t_k - t_{k-1} < 10^{-6} .$$

385 We computed  $\mathbf{T}$  for both bounds of  $P(\tau_k > 0)$  when  $k > 0$  (*Equation 16*). We present only results for  
386 the lower bound. None of our conclusions would be changed if we used the upper bound results  
387 instead (not shown).

388 Variance in extinction time

389 We calculated the variance in extinction time by computing

$$\text{Var}[T] = \sum_{k=0}^{\infty} \text{Var}[\tau_k] , \quad (22)$$

390 up to the same value of  $k$  used to calculate  $\mathbf{T}$  (see *Equation 7*). Again, we only present results for  
391 the lower bound of  $P(\tau_k > 0)$  when  $k > 0$  (*Equation 16*). *Equation 22* assumes that the extinction  
392 times of different classes are independent (i.e., we ignore the covariance terms). This assumption  
393 was confirmed by simulations (not shown).

394 Coefficient of variation in extinction time

395 The coefficient of variation measures the variability of a variable relative to its mean. We calculated  
396 the coefficient of variation of extinction time by computing

$$\text{CV}[T] = \frac{\sqrt{\text{Var}[T]}}{\mathbf{T}} . \quad (23)$$

## 397 **Code availability**

398 Numerical calculations and stochastic simulations of the branching process model were done us-  
399 ing software written in Python 2.7 and available at [https://github.com/rbasev/doomed/blob/master/  
400 python/doomed.py](https://github.com/rbasev/doomed/blob/master/python/doomed.py).

## 401 **Acknowledgments**

402 We thank Alex Stewart, Ata Kalirad, Herbert Levine, and Erin Kelleher for helpful discussions.

## 403 **References**

- 404 **Allen JM**, Light JE, Perotti AM, Braig HR, Reed DL. Mutational meltdown in primary endosymbionts: selection  
405 limits Muller's ratchet. *PLoS One*. 2009; 4(3):e4969. doi: [10.1371/journal.pone.0004969](https://doi.org/10.1371/journal.pone.0004969).
- 406 **Andor N**, Graham TA, Jansen M, Xia LC, Aktipis CA, Petritsch C, Ji HP, Maley CC. Pan-cancer analysis of the extent  
407 and consequences of intratumor heterogeneity. *Nat Med*. 2016 Jan; 22(1):105–113. doi: [10.1038/nm.3984](https://doi.org/10.1038/nm.3984).
- 408 **Bank C**, Renzette N, Liu P, Matuszewski S, Shim H, Foll M, Bolon DNA, Zeldovich KB, Kowalik TF, Finberg RW,  
409 et al. An experimental evaluation of drug-induced mutational meltdown as an antiviral treatment strategy.  
410 *Evolution*. 2016 Sep; 70(11):2470–2484. doi: [10.1111/evo.13041](https://doi.org/10.1111/evo.13041).
- 411 **Barrick JE**, Yu DS, Yoon SH, Jeong H, Oh TK, Schneider D, Lenski RE, Kim JF. Genome evolution and adaptation  
412 in a long-term experiment with *Escherichia coli*. *Nature*. 2009; 461(7268):1243–7. doi: [10.1038/nature08480](https://doi.org/10.1038/nature08480).
- 413 **Birkbak NJ**, Eklund AC, Li Q, McClelland SE, Endesfelder D, Tan P, Tan IB, Richardson AL, Szallasi Z, Swanton  
414 C. Paradoxical relationship between chromosomal instability and survival outcome in cancer. *Cancer Res*.  
415 2011 May; 71(10):3447–52. doi: [10.1158/0008-5472.CAN-10-3667](https://doi.org/10.1158/0008-5472.CAN-10-3667).
- 416 **Brown JS**, O'Carrigan B, Jackson SP, Yap TA. Targeting DNA repair in cancer: beyond PARP inhibitors. *Cancer*  
417 *Discovery*. 2017; 7(1):20–37. doi: [10.1158/2159-8290.CD-16-0860](https://doi.org/10.1158/2159-8290.CD-16-0860).
- 418 **Bull J**, Sanjuán R, Wilke C. Theory of lethal mutagenesis for viruses. *J Virol*. 2007; 81(6):2930–2939. doi:  
419 [10.1128/JVI.01624-06](https://doi.org/10.1128/JVI.01624-06).
- 420 **Charlesworth B**. Model for evolution of Y chromosomes and dosage compensation. *Proc Natl Acad Sci U S A*.  
421 1978; 75(11):5618–5622. doi: [10.1073/pnas.75.11.5618](https://doi.org/10.1073/pnas.75.11.5618).
- 422 **Charlesworth D**, Morgan MT, Charlesworth B. Mutation accumulation in finite outbreeding and inbreeding  
423 populations. *Genet Res*. 1993; 61(1):39–56. doi: [10.1017/S0016672300031086](https://doi.org/10.1017/S0016672300031086).
- 424 **Crotty S**, Cameron CE, Andino R. RNA virus error catastrophe: direct molecular test by using ribavirin. *Proc*  
425 *Natl Acad Sci U S A*. 2001 Jun; 98(12):6895–900. doi: [10.1073/pnas.111085598](https://doi.org/10.1073/pnas.111085598).
- 426 **Felsenstein J**. The evolutionary advantage of recombination. *Genetics*. 1974; 78(2):737–756.
- 427 **Gabriel W**, Lynch M, Bürger R. Muller's ratchet and mutational meltdowns. *Evolution*. 1993; 47(6):1744–1757.  
428 doi: [10.1111/j.1558-5646.1993.tb01266.x](https://doi.org/10.1111/j.1558-5646.1993.tb01266.x).
- 429 **Gessler DDG**. The constraints of finite size in asexual populations and the rate of the ratchet. *Genet Res*. 1995;  
430 66(3):241–253. doi: [10.1017/S0016672300034686](https://doi.org/10.1017/S0016672300034686).
- 431 **Gordo I**, Charlesworth B. On the speed of Muller's ratchet. *Genetics*. 2000; 156(4):2137–2140.
- 432 **Gordo I**, Campos PRA. Sex and deleterious mutations. *Genetics*. 2008; 179(1):621–626. doi: [10.1534/genet-  
433 ics.108.086637](https://doi.org/10.1534/genet-ics.108.086637).
- 434 **Gordo I**, Charlesworth B. The degeneration of asexual haploid populations and the speed of Muller's ratchet.  
435 *Genetics*. 2000; 154(3):1379–1387.
- 436 **Haigh J**. The accumulation of deleterious genes in a population—Muller's Ratchet. *Theor Popul Biol*. 1978;  
437 14(2):251–267. doi: [10.1016/0040-5809\(78\)90027-8](https://doi.org/10.1016/0040-5809(78)90027-8).
- 438 **Hawkins CE**, Baars C, Hesterman H, Hocking GJ, Jones ME, Lazenby B, Mann D, Mooney N, Pemberton D, Pye-  
439 croft S, et al. Emerging disease and population decline of an island endemic, the Tasmanian devil *Sarcophilus*  
440 *harrisii*. *Biol Conservat*. 2006 Aug; 131(2):307–324. doi: [10.1016/j.biocon.2006.04.010](https://doi.org/10.1016/j.biocon.2006.04.010).



- 441 **Ho EKH**, Agrawal AF. The effects of competition on the strength and softness of selection. *J Evol Biol.* 2012 Oct;  
442 25(12):2537–2546. doi: [10.1111/j.1420-9101.2012.02618.x](https://doi.org/10.1111/j.1420-9101.2012.02618.x).
- 443 **Jagers P**, Klebaner FC, Sagitov S. On the path to extinction. *Proc National Acad Sci.* 2007; 104(15):6107–6111.  
444 doi: [10.1073/pnas.0610816104](https://doi.org/10.1073/pnas.0610816104).
- 445 **Laffafian A**, King JD, Agrawal AF. Variation in the strength and softness of selection on deleterious mutations.  
446 *Evolution.* 2010; 64(11):3232–3241. doi: [10.1111/j.1558-5646.2010.01062.x](https://doi.org/10.1111/j.1558-5646.2010.01062.x).
- 447 **Lande R**. Risks of population extinction from demographic and environmental stochasticity and random catastrophes.  
448 *Am Nat.* 1993; 142(6):911–927. doi: [10.1086/285580](https://doi.org/10.1086/285580).
- 449 **Lazenby BT**, Tobler MW, Brown WE, Hawkins CE, Hocking GJ, Hume F, Huxtable S, Iles P, Jones ME, Lawrence  
450 C, et al. Density trends and demographic signals uncover the long-term impact of transmissible cancer in  
451 Tasmanian devils. *J Appl Ecol.* 2018 Feb; 55(3):1368–1379. doi: [10.1111/1365-2664.13088](https://doi.org/10.1111/1365-2664.13088).
- 452 **Loeb LA**, Essigmann JM, Kazazi F, Zhang J, Rose KD, Mullins JI. Lethal mutagenesis of HIV with mutagenic  
453 nucleoside analogs. *Proc Natl Acad Sci U S A.* 1999 Feb; 96(4):1492–7.
- 454 **Lord CJ**, Tutt ANJ, Ashworth A. Synthetic lethality and cancer therapy: lessons learned from the development  
455 of PARP inhibitors. *Annu Rev Med.* 2015 Jan; 66(1):455–470. doi: [10.1146/annurev-med-050913-022545](https://doi.org/10.1146/annurev-med-050913-022545).
- 456 **Lynch M**, Bürger R, Butcher D, Gabriel W. The mutational meltdown in asexual populations. *J Hered.* 1993 Sep;  
457 84(5):339–344.
- 458 **Lynch M**, Conery J, Burger R. Mutation accumulation and the extinction of small populations. *Am Nat.* 1995;  
459 146(4):489–518. doi: [10.1086/285812](https://doi.org/10.1086/285812).
- 460 **Lynch M**, Conery J, Burger R. Mutational meltdowns in sexual populations. *Evolution.* 1995; 49(6):1067–1080.
- 461 **Lynch M**, Gabriel W. Mutation load and the survival of small populations. *Evolution.* 1990; 44(7):1725–1737.  
462 doi: [10.1111/j.1558-5646.1990.tb05244.x](https://doi.org/10.1111/j.1558-5646.1990.tb05244.x).
- 463 **Martin G**, Aguilée R, Ramsayer J, Kaltz O, Ronce O. The probability of evolutionary rescue: towards  
464 a quantitative comparison between theory and evolution experiments. *Phil Trans R Soc B.* 2013 Jan;  
465 368(1610):20120088. doi: [10.1098/rstb.2012.0088](https://doi.org/10.1098/rstb.2012.0088).
- 466 **Matuszewski S**, Ormond L, Bank C, Jensen JD. Two sides of the same coin: A population genetics perspective  
467 on lethal mutagenesis and mutational meltdown. *Virus Evolution.* 2017 Jan; 3(1). doi: [10.1093/ve/vex004](https://doi.org/10.1093/ve/vex004).
- 468 **McCallum H**, Jones M, Hawkins C, Hamede R, Lachish S, Sinn DL, Beeton N, Lazenby B. Transmission dy-  
469 namics of Tasmanian devil facial tumor disease may lead to disease-induced extinction. *Ecology.* 2009 dec;  
470 90(12):3379–3392. doi: [10.1890/08-1763.1](https://doi.org/10.1890/08-1763.1).
- 471 **McFarland CD**, Korolev KS, Kryukov GV, Sunyaev SR, Mirny LA. Impact of deleterious passenger mutations on  
472 cancer progression. *Proc Natl Acad Sci USA.* 2013; 110(8):2910–2915. doi: [10.1073/pnas.1213968110](https://doi.org/10.1073/pnas.1213968110).
- 473 **McFarland CD**, Mirny LA, Korolev KS. Tug-of-war between driver and passenger mutations in cancer and other  
474 adaptive processes. *Proc Natl Acad Sci USA.* 2014; 111(42):15138–15143. doi: [10.1073/pnas.1404341111](https://doi.org/10.1073/pnas.1404341111).
- 475 **Melzer AL**, Koeslag JH. Mutations do not accumulate in asexual isolates capable of growth and extinction—  
476 Muller's ratchet re-examined. *Evolution.* 1991 5; 45(3):649–655. doi: [10.1111/j.1558-5646.1991.tb04335.x](https://doi.org/10.1111/j.1558-5646.1991.tb04335.x).
- 477 **Metzger JJ**, Eule S. Distribution of the fittest individuals and the rate of Muller's ratchet in a model with over-  
478 lapping generations. *PLoS Comput Biol.* 2013; 9(11):e1003303. doi: [10.1371/journal.pcbi.1003303](https://doi.org/10.1371/journal.pcbi.1003303).
- 479 **Moran NA**. Accelerated evolution and Muller's ratchet in endosymbiotic bacteria. *Proc Natl Acad Sci U S A.* 1996  
480 Apr; 93(7):2873–8.
- 481 **Muller HJ**. The relation of recombination to mutational advance. *Mutat Res.* 1964; 1(1):2–9. doi: [10.1016/0027-5107\(64\)90047-8](https://doi.org/10.1016/0027-5107(64)90047-8).
- 482
- 483 **Neher RA**, Shraiman BI. Fluctuations of fitness distributions and the rate of Muller's ratchet. *Genetics.* 2012;  
484 191(4):1283–1293. doi: [10.1534/genetics.112.141325](https://doi.org/10.1534/genetics.112.141325).
- 485 **Pamilo P**, Nei M, Li W. Accumulation of mutations in sexual and asexual populations. *Genet Res.* 1987;  
486 49(02):135–146. doi: [10.1017/S0016672300026938](https://doi.org/10.1017/S0016672300026938).



- 487 **Pariente N**, Sierra S, Lowenstein PR, Domingo E. Efficient virus extinction by combinations of a mutagen and  
488 antiviral inhibitors. *J Virol*. 2001 Oct; 75(20):9723–30. doi: [10.1128/JVI.75.20.9723-9730.2001](https://doi.org/10.1128/JVI.75.20.9723-9730.2001).
- 489 **Poon A**, Otto SP. Compensating for our load of mutations: Freezing the meltdown of small populations. *Evolu-*  
490 *tion*. 2000; 54(5):1467–1479.
- 491 **Rouzine IM**, Brunet É, Wilke CO. The traveling-wave approach to asexual evolution: Muller’s ratchet and speed  
492 of adaptation. *Theor Popul Biol*. 2008; 73(1):24–46. doi: [10.1016/j.tpb.2007.10.004](https://doi.org/10.1016/j.tpb.2007.10.004).
- 493 **Rouzine IM**, Wakeley J, Coffin JM. The solitary wave of asexual evolution. *Proc Natl Acad Sci U S A*. 2003;  
494 100(2):587–592. doi: [10.1073/pnas.242719299](https://doi.org/10.1073/pnas.242719299).
- 495 **Rowe G**, Beebee TJC. Population on the verge of a mutational meltdown? Fitness costs of genetic load for an  
496 amphibian in the wild. *Evolution*. 2003 Jan; 57(1):177–81.
- 497 **Silander O**, Tenaillon O, Chao L. Understanding the evolutionary fate of finite populations: the dynamics of  
498 mutational effects. *PLoS Biol*. 2007; 5(4):e94. doi: [10.1371/journal.pbio.0050094](https://doi.org/10.1371/journal.pbio.0050094).
- 499 **Silva JM**, Garcia JM, Dominguez G, Silva J, Rodriguez R, Portero JL, Corbacho C, Provencio M, España P, Bonilla  
500 F. DNA damage after chemotherapy correlates with tumor response and survival in small cell lung cancer  
501 patients. *Mutat Res*. 2000 Nov; 456(1-2):65–71.
- 502 **Stephan W**, Chao L, Smale J. The advance of Muller’s ratchet in a haploid asexual population: approximate  
503 solutions based on diffusion theory. *Genet Res*. 1993; 61(3):225–231. doi: [10.1017/S0016672300031384](https://doi.org/10.1017/S0016672300031384).
- 504 **Wallace B**. Hard and soft selection revisited. *Evolution*. 1975; 29(3):465–473. doi: [10.2307/2407259](https://doi.org/10.2307/2407259).
- 505 **Wardlaw AM**, Agrawal AF. Temporal variation in selection accelerates mutational decay by Muller’s ratchet.  
506 *Genetics*. 2012; 191(3):907–916. doi: [10.1534/genetics.112.140962](https://doi.org/10.1534/genetics.112.140962).
- 507 **Wielgoss S**, Barrick JE, Tenaillon O, Wiser MJ, Dittmar WJ, Cruveiller S, Chane-Woon-Ming B, Médigue C, Lenski  
508 RE, Schneider D. Mutation rate dynamics in a bacterial population reflect tension between adaptation and  
509 genetic load. *Proc Natl Acad Sci U S A*. 2013 Jan; 110(1):222–227. doi: [10.1073/pnas.1219574110](https://doi.org/10.1073/pnas.1219574110).
- 510 **Zeyl C**, Mizesko M, De Visser JAGM. Mutational meltdown in laboratory yeast populations. *Evolution*. 2001;  
511 55(5):909–917. doi: [10.1111/j.0014-3820.2001.tb00608.x](https://doi.org/10.1111/j.0014-3820.2001.tb00608.x).

512 **Appendix 1**

513 **Proof of Equation 5**

514 Given real numbers  $b$  and  $x$  and  $n \in \mathbb{N}$  (the nonnegative integers), let  $A$  denote the “almost  
515 diagonal”  $n \times n$  matrix

$$516 \quad A = \begin{pmatrix} 1 & b & & & \\ & x & bx & & \\ & & x^2 & bx^2 & \\ & & & \ddots & \ddots \\ & & & & x^{n-1} \end{pmatrix},$$

517 whose  $i$ th row is simply  $x^{i-1}$  multiplied by  $(0 \ 0 \ \dots \ 0 \ 1 \ b \ 0 \ 0 \ 0 \ \dots)$ , the 1 occurring in the  $i$ th position. Since  $A$  is upper triangular, so is its  $k$ th power (for  $k \in \mathbb{N}$ ), with  
518 diagonal entries

$$519 \quad A^k(i, i) = x^{k(i-1)}.$$

520 The superdiagonal entries aren’t quite as simple, but can also be expressed explicitly in  
521 terms of  $x$ ,  $k$  and  $b$ .

522 **Lemma 1.** For  $n, k \in \mathbb{N}$ ,  $1 \leq i \leq n-1$  and  $1 \leq j \leq n-i$  one has

$$523 \quad A^k(i, i+j) = b^j x^{\frac{j(j-1)}{2} + k(i-1)} \prod_{\ell=1}^j \frac{x^{k+1-\ell} - 1}{x^\ell - 1},$$

524 provided that we declare  $x^0 = 1$ .

525 *Proof.* We induct on  $k$ . When  $k = 1$ , for  $j = 1$  and any  $i$  the given expression becomes

$$526 \quad bx^{k(i-1)} \frac{x-1}{x-1} = bx^{(i-1)} = A(i, i+1).$$

527 When  $j \geq 2$ , then the  $\ell = 2$  factor in the product is  $\frac{x^{2-2}-1}{x^2-1} = 0$ , so that regardless of  $i$  the  
528 entire expression becomes 0, which again equals  $A(i, i+j)$ . We conclude that the stated  
529 result holds for  $k = 1$ .

530 Now assume the result is true for some  $k \geq 1$ . Since  $A^{k+1} = A \cdot A^k$  and  $A(i, \ell) = 0$  unless  
531  $\ell \in \{i, i+1\}$ ,

$$532 \quad \begin{aligned} A^{k+1}(i, i+j) &= \sum_{\ell=1}^n A(i, \ell) A^k(\ell, i+j) \\ &= x^{i-1} A^k(i, i+j) + bx^{i-1} A^k(i+1, i+j) \\ &= x^{i-1} (A^k(i, i+j) + bA^k(i+1, (i+1) + (j-1))). \end{aligned}$$

Using the inductive hypothesis<sup>a</sup> we obtain

$$\begin{aligned}
 & A^{k+1}(i, i+j) \\
 &= b^j x^{i-1 + \frac{(j-1)(j-2)}{2} + ki} \left( \prod_{\ell=1}^{j-1} \frac{x^{k+1-\ell} - 1}{x^\ell - 1} \right) \left( x^{j-k-1} \frac{x^{k+1-j}}{x^j - 1} + 1 \right) \\
 &= b^j x^{i-1 + \frac{(j-1)(j-2)}{2} + ki} \left( \prod_{\ell=1}^{j-1} \frac{x^{k+1-\ell} - 1}{x^\ell - 1} \right) \left( \frac{1 - x^{j-k-1} + x^j - 1}{x^j - 1} \right) \\
 &= b^j x^{i-1 + \frac{(j-1)(j-2)}{2} + ki + j - k - 1} \left( \prod_{\ell=1}^{j-1} \frac{x^{k+1-\ell} - 1}{x^\ell - 1} \right) \left( \frac{x^{k+1} - 1}{x^j - 1} \right) \\
 &= b^j x^{\frac{j(j-1)}{2} + (k+1)(i-1)} \left( \prod_{\ell=1}^{j-1} \frac{x^{k+1-\ell} - 1}{x^\ell - 1} \right) \left( \frac{x^{k+1} - 1}{x^j - 1} \right) \\
 &= b^j x^{\frac{j(j-1)}{2} + (k+1)(i-1)} \left( \prod_{\ell=1}^j \frac{1}{x^\ell - 1} \right) \left( \prod_{\ell=0}^{j-1} (x^{k+1-\ell} - 1) \right) \\
 &= b^j x^{\frac{j(j-1)}{2} + (k+1)(i-1)} \left( \prod_{\ell=1}^j \frac{x^{(k+1)+1-\ell} - 1}{x^\ell - 1} \right),
 \end{aligned}$$

539  
540  
541  
542  
543  
544  
545  
546  
547  
548

which shows that the formula holds for the exponent  $k+1$ . This concludes the proof.  $\square$

<sup>a</sup>Strictly speaking, the inductive hypothesis will only apply to the term  $A^k(i+1, (i+1) + (j-1))$  when  $j \geq 2$ . However, if we adopt the convention that any empty product is equal to one, the expression stated in the result agrees with  $A^k(i+1, (i+1) + (j-1))$  when  $j = 1$  as well.

## 549 Appendix 2

### 550 Overestimation of the Expected Extinction Time

551 As shown in the **Model** section, an approximation is made in **Equation 9** in order to derive  
552 analytical expressions for click times ( $t_k$ ) and time to extinction (**T**). **Figure 2D**, **Figure 3A**, **Fig-**  
553 **ure 3B**, and **Figure 3–Figure Supplement 2A** show that the approximation is quite accurate  
554 over broad ranges of parameters but consistently overestimates **T**.

555 Overestimation of **T** is partly explained by the concavity of  $E[\tau_k]$  as a function of  $x_k$  in  
556 Equation 6. The second derivative with respect to  $x_k$  is

$$557 \frac{d^2 E[\tau_k]}{dx_k^2} = - \sum_{i=1}^{\infty} \left( \varphi_k^{(i)}(0) \right)^{x_k} \ln^2 \left( \varphi_k^{(i)}(0) \right)$$

558 which is negative because both factors of each term in the sum are positive and hence the  
559 function is concave. By the reversed Jensen's inequality, for a concave function,  $E[f(X)] <$   
560  $f(E[X])$ , which implies that  $E[\tau_k]$  is consistently overestimated by **Equation 6**. Thus, **Equa-**  
561 **tion 10** overestimates **T**.  
562  
563

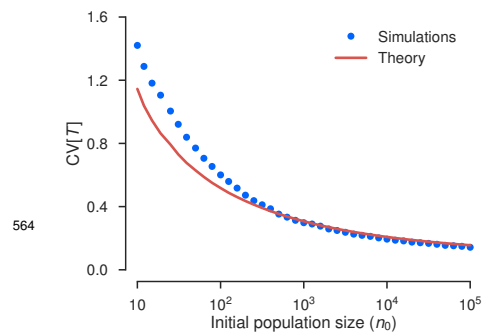

**Figure 2-Figure supplement 1. Variability of extinction time declines with population size.** Blue circles show coefficient of variation of  $T$ ,  $CV[T]$ , for the data shown in **Figure 2D**. Red line shows  $CV[T]$  calculated numerically using **Equation 23**.

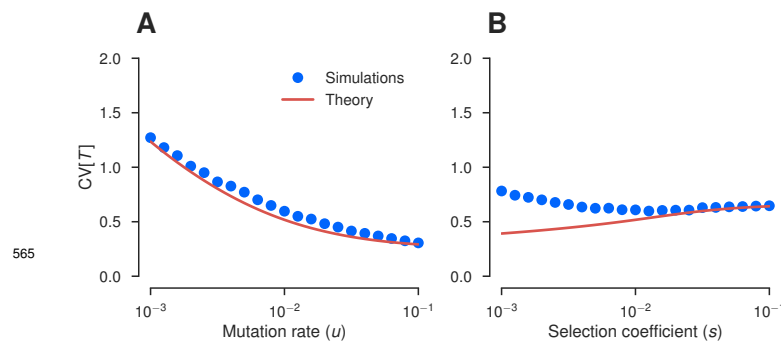

**Figure 3-Figure supplement 1. Variability of extinction time declines with mutation rate and is approximately invariant with selection coefficient.** Blue circles show coefficient variation of  $T$ ,  $CV[T]$ , for the data shown in the corresponding panel of **Figure 3**. Red line shows  $CV[T]$  calculated numerically using **Equation 23**.

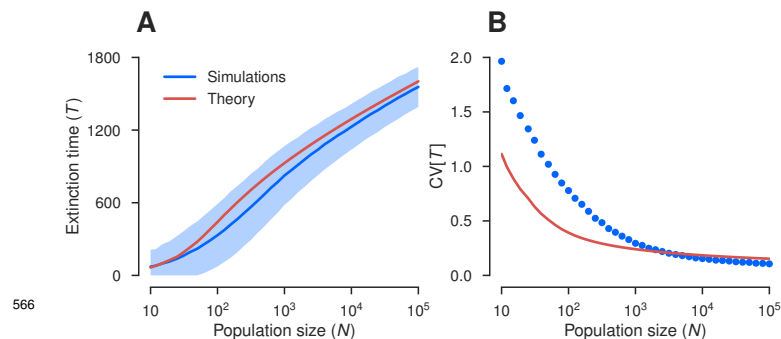

**Figure 3-Figure supplement 2. Theoretical predictions for low  $s$  become more accurate with increasing population size.** **(A)** Extinction times of populations with  $u = 0.01$  and  $s = 10^{-3}$  over a range of initial populations sizes,  $n_0$ . Blue line shows mean values of  $T$  based on stochastic simulations of  $10^4$  replicate populations for 41 values of  $n_0$  evenly spaced on a log-scale over 4 orders of magnitude. Light blue region indicates  $\bar{T} \pm SD[T]$ . If  $SD[T] > \bar{T}$ , the lower bound of the region was set to zero. **(B)** Variability of extinction times shown in **(A)**. Blue circles show coefficient variation of  $T$ ,  $CV[T]$ . Red line shows  $CV[T]$  calculated numerically using **Equation 23**.

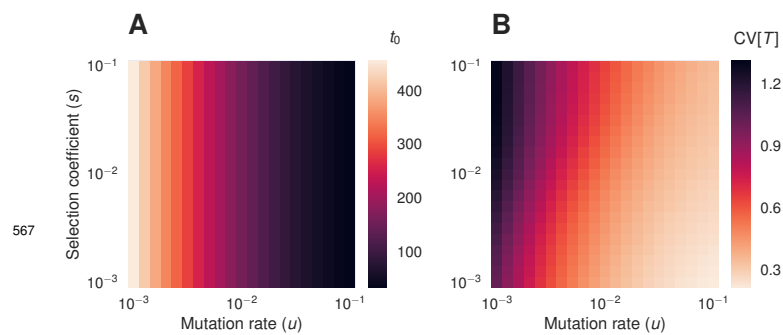

**Figure 4-Figure supplement 1. Expected extinction time of the mutation-free class and variability of extinction time. (A)** Expected extinction time of the mutation-free class,  $t_0$ , used in Figure 4B. **(B)** Coefficient of variation of  $T$ ,  $CV[T]$ , calculated numerically using Equation 23.
